# Supplementary material
Source: publisher figshare collection journal article supplement (https://gsapubs.figshare.com/articles/dataset/_/12535106)
Supplement: Supplementary file 1 [file 1]

## Sheet: XRF data
	1	1	1	1	1	1	1	1	1	1	1			2	2	2	2	2	2	2	2	2	2	2
Sample ID	2	3	4	5	6	7	8	9	10	11	12			2	3	4	5	6	7	8	9	10	11	12
Distance index	1.4	2.1	2.8	3.5	4.2	4.9	5.6	6.3	7	7.7	8.4			1.4	2.1	2.8	3.5	4.2	4.9	5.6	6.3	7	7.7	8.4
XRF analysis	X31	X32	X33	X34	X35	X36	X37	X38	X39	X310	X311	Polya unaltered coarse grain		4A1	4 A2	4A3	4A4	4 A5	4 A6	4A7	4A8	4 A9	4A10	4A11	Polya unaltered fine grain
SiO2 wt %	51.418	56.576	59.436	58.1	59.378	63.039	62.597	63.259	64.029	63.894	64.114	71.45		61.627	59.643	61.107	60.914	60.439	60.446	60.894	61.274	61.075	61.557	61.147	61.04
TiO2 wt %	0.941	0.917	0.943	0.893	0.84	0.867	0.87	0.851	0.895	0.806	0.785	0.76		0.965	0.955	0.983	1.002	1.008	1.007	0.997	0.996	0.999	0.99	0.986	0.98
Al2O3 wt %	25.104	22.047	21.212	20.189	18.429	17.264	16.7	16.212	16.019	14.995	14.704	14.95		21.211	21.827	20.643	20.501	20.605	20.408	20.499	20.495	20.547	20.442	19.764	20.65
Fe2O3 wt %	3.68	4.248	4.758	5.003	5.285	5.283	5.57	5.781	5.92	5.791	5.599	6.16		6.786	6.999	7.105	7.398	7.338	7.29	7.19	7.102	7.113	7.065	7.165	7.27
MnO wt %	0.084	0.086	0.082	0.09	0.097	0.086	0.09	0.096	0.1	0.104	0.108	0.07		0.043	0.058	0.058	0.062	0.061	0.059	0.064	0.062	0.064	0.065	0.077	0.02
MgO wt %	1.774	1.742	1.793	1.846	1.858	1.624	1.597	1.629	1.62	1.683	1.688	2.17		2.628	2.483	2.661	2.78	2.797	2.779	2.791	2.807	2.797	2.811	2.759	2.27
CaO wt %	0.848	0.79	0.571	1.096	1.49	0.725	0.897	1.03	1.018	1.473	1.879	0.06		0.379	0.284	0.219	0.217	0.213	0.21	0.202	0.2	0.197	0.194	0.199	0.38
Na2O wt %	0.228	0.21	0.221	0.203	0.214	0.281	0.313	0.319	0.371	0.314	0.296	1.44		0.502	0.48	0.454	0.447	0.423	0.406	0.388	0.382	0.369	0.368	0.371	0.76
K2O wt %	9.36	7.963	7.399	7.341	6.483	5.443	4.947	4.723	4.377	4.386	4.327	2.04		4.914	5.174	4.98	5.05	5.179	5.257	5.38	5.447	5.518	5.532	5.5	3.92
P2O5 wt %	0.584	0.588	0.444	0.844	1.188	0.595	0.732	0.853	0.855	1.232	1.592	0.14		0.287	0.203	0.16	0.159	0.157	0.154	0.149	0.149	0.146	0.145	0.151	0.54
Ag	9.8	16.2	20.3	13.4	12	20.5	19.5	19	16.5	18	12.4			23.5	11.8	10.5	10.4	6.8	9.1	6.9	7.1	6.4	6.4	6
As	1567.3	5901.3	10926.4	7247.2	5976.7	6268.6	4854.9	5997.7	4799.6	3929.3	2681			17535.5	5040.6	1734.5	1102.2	981.7	928.2	704.2	738.5	684.6	679.7	654.8
Ba	470.1	440.2	430.4	415.5	361.2	339.7	314	296.6	280.2	262.7	266.7			462.9	511.4	499	511.7	526.8	531.6	541.2	557.1	570.3	562	574.4
Cd	0	0	7.5	1.8	1	5.8	0.4	0	0	1.6	0			4	4.7	0	1.5	0	0	4.5	0	5.1	4.2	5.7
Ce	54.6	84.2	129	89.3	99.4	89.8	80.9	82.5	73.1	83.7	74.1			157.6	93.5	68.1	80.8	72	67.4	64.1	80.1	79.1	52.5	83.9
Cl	6.6	3.8	4.1	0	1.9	3.3	0	1.6	1.4	4.3	1.4			20.2	14.7	17.7	20.1	24.4	29.3	25.2	28.3	26.9	32.9	31.2
Co	9.7	15.2	23.1	15.9	15.8	17.6	15.3	17.1	18	14.8	13.9			24.1	16.8	13.7	13.3	13.6	14.8	13.6	14	16	15.9	15.5
Cr	112.5	111	110.9	107.4	101.3	102.6	105.3	102.3	105	94.5	88			124.5	124.2	123.6	121.8	120	124.8	122.3	123.3	124.3	121.9	122.2
Cs	68	51.9	53.2	62.3	63.3	49.9	43.9	47.4	38.1	50.4	49.6			60.2	48.1	72.5	92.8	100.2	108.8	116.6	124.2	128.6	133	139.4
Cu	27.5	292.5	223.3	273.5	269.2	165.9	152.6	167	157.5	143.5	152			253.6	345.6	247.5	218.1	196.1	178.8	158	149.9	137.8	131.7	117.7
F	10579.4	10083.8	10253.4	10252.2	10280.6	8600.2	8289.7	8374.1	7864	8328	8762.5			6447.2	6093.5	6066.9	6138.6	6235.5	6148.4	6273.7	6285.2	6230	6295.6	5963.9
Ga	58.8	44.9	39.7	40	34.1	30.7	29.3	27.6	27.4	25.6	25			32	35.9	30.2	29.5	28.2	28.3	27.4	27	25.9	26.4	25.8
Hf	7.7	4.9	4.6	2.5	3.1	4.3	6	3.9	5.4	3.4	3.2			3.3	1.5	2	3.1	0.6	3.8	3	5	2.9	5.4	2.8
La	21	24.4	30.9	24.8	31.3	26.3	26.6	24.1	31.7	25.7	32.3			32.3	33.2	33.6	35	39.9	36.8	35.3	37.9	36.7	36.3	36.7
Nb	41.7	31.7	29.6	28.3	24.7	21.8	20.1	19.1	19	18	17			22.5	16.7	14	14.7	15.2	15.6	15.5	15.7	15.2	15.8	16
Nd	18.8	23.6	31.7	30.9	41.6	28.1	27.7	29	31	37.6	35.4			39.1	35.6	29.9	32.5	32.8	28.6	31.9	28.5	32.1	28.5	34.6
Ni	30.7	33.5	39.2	32.8	34.1	38.1	38.4	35.5	39	34	35.9			40.9	49.5	48.2	51.8	52.4	52.6	52	54.2	53.1	50.9	52.7
Pb	10.6	14.5	12.1	14.5	12.5	7.4	7.1	7.7	8.8	3.6	4.2			65.3	67.1	54.8	49.5	52	49.8	42	42.7	43.3	38.5	36.2
Rb	1325.7	1098.5	1048	1050.7	920.5	709.1	614.7	603.2	563.2	581.1	568.8			653.2	592.3	554.1	585.5	612.2	637.4	655.9	669.6	679.7	690.7	704.8
S	250.8	1872.9	3422.1	5311.9	5699.3	3518.7	3469.8	4303.2	3903.5	4177.1	4495.9			14629.8	14706.8	9895.6	8738.9	8197	7531.8	6363.8	5698.7	5800.6	5215.2	4880
Sb	1.3	3.3	8.1	9	8.7	6.2	3.2	4.2	2.8	4.4	1.5			6.6	3.2	1.3	0.8	0.4	1.4	2.3	0	0.5	0.8	0.3
Sc	19.3	17.4	19.3	16.7	15.5	17.4	17	16.7	17.8	15.9	16			17.5	25.4	23.1	24.8	23.5	22.9	22.7	22.9	23.2	21.9	22
Sn	78.7	70.2	72.9	73.7	65.6	52.3	46.1	45.8	43.8	41.9	41.2			103.1	74.6	53.7	51.3	51.2	52.1	53.4	53.1	53.3	51.8	53
Ta	17.5	10.4	10.9	8.4	2.2	0	0.9	0.1	0	0	0			0	0	0	1.1	0	0	1.1	1.5	0	0.2	0
Sr	53	46.7	43.1	53.4	62.9	51.2	57.7	59.5	61.6	66.2	72.2			80.7	83.7	81.5	81.1	80.8	78.7	77.8	76.9	76.9	75.2	75.7
Th	10.1	11.7	10.3	10.6	9.1	8.8	10.9	8.7	9.2	9.2	9.6			21.4	16.2	13.2	11.5	11.9	10.9	11.3	10.2	9.9	10.4	8.1
U	5.3	6.6	6.8	3.2	5	5	3.8	4.2	4.6	4.8	3.4			5.1	2.9	3.7	5.6	4	4	5.2	4.5	4.5	4.4	2.9
V	143.9	129.1	133.8	128.5	122.1	127.9	126.9	124.7	128.3	114.8	114.3			145.9	176.7	169	168.2	171.7	170.5	171.3	169.6	169	169.5	169.2
W	94.4	76.5	68	66.7	64	57.1	52.9	51.3	50.6	49.5	48.2			131.4	96.4	39.6	36.5	37	35.8	35.2	36.4	33.8	38	33.3
Y	34	36.6	29.7	47.6	67.4	42	51.7	57	56.3	72.5	83.6			35.5	36.2	35.8	36.8	36.8	36.9	36.8	37.2	36.8	36.8	36.6
Zn	98.6	97.8	108.3	104.7	123.3	168.5	210.3	216.5	272.7	234.6	243.6			240.9	202.4	164.7	162.2	153.3	144.5	135.7	129.2	126.4	121.4	114.8
Zr	257.9	255.5	265.6	241.8	236.5	243.5	245.8	239	236.8	221.1	218.4			216.6	203.4	195.4	199.5	202.2	203.8	201	199.6	200.3	198	199.8

## Sheet: Gains&losses
	Element gain/ loss normalized to Zr and most distal sample
Sample ID	1	2	3	4	5	6	7	8	9	10	12			1	2	3	4	5	6	7	8	9	10	11
Approximate distance (cm)	2	3	4	5	6	7	8	9	10	11	12			2	3	4	5	6	7	8	9	10	11	12
XRF analysis	X31	X32	X33	X34	X35	X36	X37	X38	X39	X310	X311	Average gain(+)/loss(-)		4A1	4 A2	4A3	4A4	4 A5	4 A6	4A7	4A8	4 A9	4A10	4A11	Average gain(+)/loss(-)
SiO2 wt %	-32.0853	-24.5705	-23.7708	-18.1498	-14.4748	-11.8119	-13.2496	-9.83787	-7.89255	-1.56012	0	-14.3094		-7.03213	-4.18602	2.1849	-0.231246	-2.33107	-3.08663	-1.0083	0.308105	-0.367081	1.5857	0	-2.31612
TiO2 wt %	1.51291	-0.146933	-1.22055	2.74913	-1.18312	-0.938908	-1.52628	-0.936279	5.15364	1.42132	0	0.444084		-9.72086	-4.85828	1.94068	1.77553	1.01781	0.125307	0.511943	1.11542	1.06554	1.31846	0	-2.71573
Al2O3 wt %	44.5802	28.1669	18.6235	24.0154	15.7411	5.30757	0.914072	0.752501	0.477968	0.733719	0	12.6648		-1.0027	8.48351	6.79942	3.88499	3.01776	1.23179	3.09967	3.80255	3.70223	4.37076	0	4.5413
Fe2O3 wt %	-44.3406	-35.1461	-30.1223	-19.292	-12.8322	-15.3701	-11.6075	-5.64884	-2.48259	2.16614	0	-15.8797		-12.6356	-4.04572	1.39553	3.40719	1.19891	-0.252358	-0.25018	-0.779955	-0.973564	-0.49927	0	-2.96964
MnO wt %	-34.1347	-31.933	-37.5669	-24.7312	-17.059	-28.5786	-25.9561	-18.7727	-14.6021	-4.87964	0	-21.6558		-48.4872	-26.0085	-22.9792	-19.3594	-21.7195	-24.8805	-17.3793	-19.3998	-17.0906	-14.817	0	-29.2086
MgO wt %	-11.0015	-11.786	-12.6561	-1.22305	1.64704	-13.7087	-15.9373	-11.8132	-11.4857	-1.51376	0	-8.1344		-12.1361	-11.5965	-1.3802	0.912666	0.174019	-1.25204	0.555901	1.8417	1.12425	2.81097	0	-6.05002
CaO wt %	-61.7818	-64.0613	-75.0119	-47.3158	-26.7714	-65.3929	-57.5833	-49.9084	-50.032	-22.5645	0	-47.3112		75.6803	40.1877	12.5284	9.2092	5.76473	3.45644	0.901523	0.603216	-1.25214	-1.62631	0	34.4014
Na2O wt %	-34.7704	-39.3558	-38.6061	-38.0558	-33.2358	-14.8532	-6.04425	-1.51872	15.5987	4.78565	0	-16.9142		24.815	27.0901	25.1275	20.6664	12.6629	7.28609	3.95784	3.06813	-0.787363	0.0931144	0	24.4248
K2O wt %	83.1851	57.3083	40.6082	53.2374	38.36	12.8249	1.58411	-0.256229	-6.70452	0.125713	0	25.4794		-17.5844	-7.59228	-7.41565	-8.04375	-6.95403	-6.29417	-2.76581	-0.864402	0.0768302	1.4962	0	-10.159
P2O5 wt %	-68.935	-68.4284	-77.0668	-52.1154	-31.088	-66.4782	-59.1456	-51.0378	-50.4671	-23.5581	0	-49.8473		75.3242	32.0577	8.34627	5.45636	2.7394	-0.0149478	-1.91361	-1.22563	-3.55262	-3.10054	0	30.2961
Ag	-33.0723	11.6748	34.6167	-2.39334	-10.6322	48.2811	39.7281	40.0189	22.725	43.3886	0	17.6668		261.288	93.1858	78.9406	73.594	11.9881	48.6899	14.3134	18.4519	6.4004	7.63636	0	126.752
As	-50.4941	88.1536	235.123	144.157	105.867	109.714	60.8993	104.429	65.1122	44.7712	0	82.5212		2370.28	656.168	170.855	68.5793	48.1441	38.971	6.90223	12.8955	4.29002	4.74635	0	816.471
Ba	49.2686	41.0876	32.7009	40.7163	25.068	14.2421	4.61101	1.62554	-3.10172	-2.70266	0	18.5014		-25.6622	-12.5438	-11.1705	-10.7818	-9.37549	-9.26772	-6.34245	-2.91466	-0.961632	-1.26931	0	-15.0396
Cd	#N/A	#N/A	#N/A	#N/A	#N/A	#N/A	#N/A	#N/A	#N/A	#N/A	#N/A	#N/A		-35.2675	-19.0033	-100	-73.6446	-100	-100	-21.524	-100	-10.7497	-25.6459	0	-56.9789
Ce	-37.6013	-2.8695	43.1516	8.85029	23.8767	8.69556	-2.99345	1.7397	-9.01494	11.5761	0	4.12825		73.2732	9.46976	-17.0042	-3.55006	-15.2021	-21.243	-24.0556	-4.43354	-5.95644	-36.8566	0	15.5472
Cl	299.225	132.016	140.813	-100	25.3277	111.417	-100	4.43515	-7.77027	203.392	0	64.4414		-40.2781	-53.7185	-41.9918	-35.48	-22.7231	-7.93293	-19.713	-9.20398	-13.9973	6.40734	0	-42.8671
Co	-40.904	-6.52607	36.6538	3.31864	4.96966	13.5668	-2.19808	12.418	19.4342	5.17458	0	4.17342		43.4242	6.46874	-9.62261	-14.0645	-13.2995	-6.3902	-12.7819	-9.58692	2.96813	3.5132	0	6.55145
Cr	8.26078	7.82067	3.62712	10.2346	6.30367	4.57271	6.32036	6.23013	10.0468	6.075	0	6.31744		-6.02006	-0.162218	3.42325	-0.177449	-2.9659	0.123191	-0.51567	1.00127	1.46458	0.66136	0	-0.734118
Cs	16.099	-10.5568	-11.8029	13.4495	17.8538	-9.76552	-21.3582	-12.6724	-29.1542	0.37204	0	-4.32142		-60.1645	-66.1057	-46.8203	-33.3289	-28.9737	-23.4831	-16.8552	-10.8146	-7.97778	-3.72375	0	-51.6048
Cu	-84.6789	64.4917	20.8008	62.5212	63.5509	-2.10591	-10.7965	0.398591	-4.43301	-6.74498	0	9.36399		98.7512	188.431	115.015	85.5803	64.6325	48.9301	33.4382	27.4853	16.7851	12.9119	0	121.944
F	2.24317	-1.63108	-3.7802	5.67819	8.34576	-11.9693	-15.9415	-12.6697	-17.2274	-6.11924	0	-4.82467		-0.281021	0.364702	4.01774	3.08407	3.31307	1.07019	4.56656	5.49301	4.20108	6.52145	0	1.79637
Ga	99.1767	53.5211	30.5795	44.5161	25.9609	10.1418	4.13539	0.884351	1.08378	1.14953	0	24.6499		14.4109	36.6845	19.6901	14.513	8.00497	7.53703	5.56751	4.75602	0.137004	3.25581	0	21.3246
Hf	103.771	30.8904	18.2041	-29.4355	-10.5391	20.5236	66.5989	11.3703	55.6377	4.95251	0	24.7249		8.71587	-47.3767	-26.963	10.8808	-78.8258	33.0506	6.5032	78.7504	3.31289	94.6104	0	-13.6858
La	-44.9423	-35.4273	-21.3352	-30.6502	-10.5123	-26.9691	-26.8272	-31.8181	-9.48352	-21.4051	0	-23.5791		-18.8154	-11.1379	-6.38528	-4.48874	7.42891	-1.69558	-4.38895	3.37323	-0.249626	-0.190736	0	-10.2068
Nb	107.725	59.394	43.1751	50.3605	34.1744	15.0168	5.05528	2.66896	3.08029	4.58935	0	29.5672		29.7178	2.52765	-10.5297	-7.98684	-6.1276	-4.41364	-3.70336	-1.77668	-5.23714	-0.352273	0	3.43223
Nd	-55.0266	-43.0137	-26.3656	-21.1591	8.52044	-28.8038	-30.474	-25.1401	-19.2339	4.91763	0	-21.4344		4.24079	1.06911	-11.6379	-5.92812	-6.32751	-18.9634	-8.3539	-17.5475	-7.45702	-16.8812	0	-3.06403
Ni	-27.5822	-20.2351	-10.2124	-17.4769	-12.2835	-4.81156	-4.95976	-9.63742	0.193857	-6.44902	0	-10.314		-28.4104	-7.73455	-6.47939	-1.55997	-1.74945	-2.14874	-1.91736	2.94935	0.507493	-2.53752	0	-11.0461
Pb	113.726	195.108	136.898	211.828	174.841	58.0287	50.2034	67.5314	93.2432	-15.3324	0	98.7341		66.3955	82.0784	54.79	36.946	41.9414	34.869	15.3294	18.074	19.3147	7.32044	0	60.0525
Rb	97.3726	65.0829	51.5048	66.8459	49.4465	11.8154	-3.9772	-3.0927	-8.6783	0.914873	0	29.7486		-14.5096	-17.4494	-19.6116	-16.8019	-14.1695	-11.338	-7.49373	-4.89913	-3.80203	-1.10966	0	-17.0931
S	-95.276	-64.391	-37.4106	6.71601	17.0648	-29.8029	-31.4261	-12.5359	-19.9229	-8.22548	0	-25.0191		176.538	196.035	107.345	79.3451	65.9776	51.3109	29.6272	16.8937	18.568	7.84039	0	139.816
Sb	-26.6072	88.0548	344.036	441.935	435.611	270.727	89.5525	155.866	72.1622	189.751	0	187.372		1929.36	947.788	343.091	167.068	31.7507	357.507	662.09	-100	66.2506	169.091	0	846.827
Sc	2.15006	-7.0411	-0.81137	-5.72581	-10.5391	-2.45996	-5.59398	-4.62134	2.60557	-1.83853	0	-3.0796		-26.6243	13.4111	7.36438	12.8968	5.55031	2.04791	2.56581	4.19521	5.1913	0.450413	0	1.762
Sn	61.7629	45.647	45.4973	61.5722	47.0375	13.8566	-0.579838	1.58346	-1.94995	0.457114	0	24.9895		79.4402	38.2635	3.60229	-3.06199	-4.54286	-3.62749	0.153196	0.289069	0.314999	-1.37564	0	29.561
Ta	#N/A	#N/A	#N/A	#N/A	#N/A	#N/A	#N/A	#N/A	#N/A	#N/A	#N/A	#N/A		#N/A	#N/A	#N/A	#N/A	#N/A	#N/A	#N/A	#N/A	#N/A	#N/A	#N/A	#N/A
Sr	-37.8359	-44.7107	-50.9132	-33.1963	-19.5484	-36.3957	-28.9917	-24.6931	-21.3109	-9.42993	0	-27.9114		-1.66351	8.61108	10.0861	7.29452	5.47021	1.92252	2.16053	1.68699	1.33162	0.242584	0	6.08206
Th	-10.9054	4.17808	-11.7752	-0.268817	-12.463	-17.7823	0.884866	-17.1862	-11.6132	-5.33695	0	-7.47892		143.706	96.4602	66.6325	42.1888	45.1698	31.9267	38.6733	26.0521	21.9171	29.5623	0	87.2468
U	32.0074	65.9307	64.4578	-14.9905	35.804	31.9	-0.694012	12.8821	24.7814	39.4525	0	26.5029		62.2218	-1.76991	30.4592	93.3938	36.2939	35.2239	78.2398	55.3279	54.7851	53.1034	0	46.0762
V	6.6144	-3.45234	-3.74253	1.54376	-1.3514	0.364005	-1.35249	-0.304638	3.52646	-0.789064	0	0.0960146		-20.4588	2.58426	2.13093	-0.441529	0.27306	-1.20947	0.63671	0.336844	-0.367534	1.08801	0	-4.04629
W	65.8541	35.6676	16.0076	24.99	22.6181	6.25338	-2.48321	-2.74206	-3.17792	1.44299	0	14.9482		263.989	184.366	21.5967	9.77444	9.79228	5.39745	5.07463	9.41884	1.24813	15.1515	0	119.931
Y	-65.5591	-62.5772	-70.7871	-48.5723	-25.5482	-54.9394	-45.0516	-37.6949	-37.8884	-14.3365	0	-42.0868		-10.5286	-2.84346	0.0167794	0.697646	-0.646982	-1.15912	-0.0538292	1.74119	0.295458	1.46051	0	-3.16441
Zn	-65.7231	-65.6819	-63.4426	-61.1791	-53.258	-37.9594	-23.2934	-18.7852	3.24732	-4.87063	0	-35.5405		93.5673	73.1861	46.6975	41.5017	31.9516	23.4006	17.4999	12.6563	9.82968	6.71048	0	63.7381
Zr	0	0	0	0	0	0	0	0	0	0	0	0		0	0	0	0	0	0	0	0	0	0	0	0
